# Supplementary material
Source: publisher figshare collection journal article supplement (https://tandf.figshare.com/articles/dataset/_/7261613)
Supplement: Supplementary file 1 [file 1]

## A Proofs

### A.1 Lemma 1

*Proof.* Let the  $h$ -step-ahead base and reconciled forecast errors be given as

$$\begin{aligned}\hat{\mathbf{e}}_t(h) &= \mathbf{y}_{t+h} - \hat{\mathbf{y}}_t(h) \\ \text{and} \quad \tilde{\mathbf{e}}_t(h) &= \mathbf{y}_{t+h} - \tilde{\mathbf{y}}_t(h),\end{aligned}$$

for  $t = 1, 2, \dots$ , where  $\hat{\mathbf{y}}_t(h)$  and  $\tilde{\mathbf{y}}_t(h)$  are the  $h$ -step-ahead base and reconciled forecasts using information up to and including time  $t$ , and  $\mathbf{y}_{t+h}$  are the observed values of all series at time  $t + h$ .

We have that

$$\begin{aligned}\tilde{\mathbf{e}}_t(h) &= \hat{\mathbf{e}}_t(h) + (\mathbf{I} - \mathbf{SP}) \hat{\mathbf{y}}_t(h) \\ &= \hat{\mathbf{e}}_t(h) + (\mathbf{I} - \mathbf{SP}) [\mathbf{y}_{t+h} - \hat{\mathbf{e}}_t(h)] \\ &= \mathbf{SP} \hat{\mathbf{e}}_t(h) + (\mathbf{I} - \mathbf{SP}) \mathbf{y}_{t+h}.\end{aligned}$$

Since  $\mathbf{y}_{t+h} = \mathbf{S} \mathbf{b}_{t+h}$ , where  $\mathbf{b}_{t+h}$  is the vector of observations at the bottom level,  $(\mathbf{I} - \mathbf{SP}) \mathbf{S} = \mathbf{0}$ . Hence  $\tilde{\mathbf{e}}_t(h) = \mathbf{SP} \hat{\mathbf{e}}_t(h)$  giving

$$\text{var}[\tilde{\mathbf{e}}_t(h) | \mathcal{I}_t] = \mathbf{SPW}_h \mathbf{P}' \mathbf{S}',$$

where  $\mathbf{W}_h$  is the variance covariance matrix of the  $h$ -step-ahead base forecast errors. □

### A.2 Theorem 1

*Proof.* Reformulate the objective function such that,

$$\text{tr}[\mathbf{SPW}_h \mathbf{P}' \mathbf{S}'] = \text{tr}[\mathbf{S}' \mathbf{SPW}_h \mathbf{P}'].$$

As  $\mathbf{S}' \mathbf{S}$  and  $\mathbf{PW}_h \mathbf{P}'$  are both symmetric, and positive definite and positive semidefinite respectively, using Lemma 1 of Wang et al. (1986) we have

$$\text{tr}[\mathbf{S}' \mathbf{SPW}_h \mathbf{P}'] \geq \lambda_{\min}(\mathbf{S}' \mathbf{S}) \text{tr}[\mathbf{PW}_h \mathbf{P}'] \geq \lambda_{\min}(\mathbf{C}' \mathbf{C} + \mathbf{I}) \text{tr}[\mathbf{PW}_h \mathbf{P}'],$$

where  $\lambda_{\min}(A)$  denotes the minimum eigenvalue of matrix  $A$  and  $S = \begin{bmatrix} C \\ I_n \end{bmatrix}$ . Since  $C'C$  and  $I$  are both symmetric, and positive semidefinite and positive definite respectively, applying Weyl's inequalities (Horn & Johnson, 1990),

$$\lambda_{\min}(C'C + I)\text{tr}[PW_hP'] \geq [\lambda_{\min}(C'C) + \lambda_{\min}(I)]\text{tr}[PW_hP'] \geq \text{tr}[PW_hP'],$$

using the fact that all the eigenvalues of an identity matrix are unity.

Now  $PS = I_n$ , so the minimization problem can be restated as

$$\min_P \text{tr}[PW_hP'] \quad \text{such that } PS = I.$$

If  $W_h$  is positive definite and we let  $L = W_h^{-\frac{1}{2}}S$  and  $H = PW_h^{\frac{1}{2}}$ , the minimization problem becomes

$$\min_H \text{tr}[HH'] \quad \text{such that } HL = I.$$

The unique solution of this well-known minimization problem is given by the Moore-Penrose generalized inverse of  $L$  (Penrose, 1956). As we know that  $L$  is full rank,  $H = (L'L)^{-1}L'$  which gives

$$P = (S'W_h^{-1}S)^{-1}S'W_h^{-1}.$$

As the above unique solution of MinT has a similar representation to a GLS estimator of a least squares problem, we can reformulate the trace minimization problem in terms of a linear equality constrained least squares problem as follows:

$$\begin{aligned} \min_{\check{y}_T(h)} \frac{1}{2} [\hat{y}_T(h) - \check{y}_T(h)]' W_h^{-1} [\hat{y}_T(h) - \check{y}_T(h)] \\ \text{s.t. } \check{y}_T(h) = S\check{b}_T(h), \end{aligned}$$

or equivalently,

$$\begin{aligned} \min_{\check{y}_T(h)} \frac{1}{2} [\hat{y}_T(h) - \check{y}_T(h)]' W_h^{-1} [\hat{y}_T(h) - \check{y}_T(h)] \\ \text{s.t. } U'\check{y}_T(h) = 0, \end{aligned}$$

where  $\check{b}_T(h)$  is the vector of last  $n$  elements of  $\check{y}_T(h)$ ,  $U' = \begin{bmatrix} I_{m^*} & -C \end{bmatrix}$  and  $m^* = m - n$ .

The Lagrangian function for the minimization problem is

$$\mathcal{L}[\tilde{\mathbf{y}}_T(h), \boldsymbol{\lambda}] = \frac{1}{2}[\hat{\mathbf{y}}_T(h) - \tilde{\mathbf{y}}_T(h)]' \mathbf{W}_h^{-1} [\hat{\mathbf{y}}_T(h) - \tilde{\mathbf{y}}_T(h)] - \boldsymbol{\lambda}' \mathbf{U}' \tilde{\mathbf{y}}_T(h),$$

where  $\boldsymbol{\lambda}$  is a Lagrange multiplier vector.

The first-order necessary conditions for  $\tilde{\mathbf{y}}_T(h)$  to be a solution of the minimization problem require that there is a vector  $\tilde{\boldsymbol{\lambda}}$  for which the following system of equations is satisfied:

$$\begin{bmatrix} \mathbf{W}_h^{-1} & \mathbf{U} \\ \mathbf{U}' & \mathbf{0} \end{bmatrix} \begin{bmatrix} \tilde{\mathbf{y}}_T(h) \\ -\boldsymbol{\lambda} \end{bmatrix} = \begin{bmatrix} \mathbf{W}_h^{-1} \hat{\mathbf{y}}_T(h) \\ \mathbf{0} \end{bmatrix}.$$

Assuming that  $\mathbf{W}_h^{-1}$  is positive definite yields the solution of the above system of equations as

$$\begin{aligned} \tilde{\mathbf{y}}_T(h) &= [\mathbf{I} - \mathbf{W}_h \mathbf{U} (\mathbf{U}' \mathbf{W}_h \mathbf{U})^{-1} \mathbf{U}'] \hat{\mathbf{y}}_T(h) \\ \text{and} \quad \tilde{\boldsymbol{\lambda}} &= -(\mathbf{U}' \mathbf{W}_h \mathbf{U})^{-1} \mathbf{U}' \hat{\mathbf{y}}_T(h). \end{aligned}$$

The  $h$ -step-ahead reconciled forecasts at the bottom level are given by

$$\tilde{\mathbf{b}}_T(h) = \left[ [\mathbf{0}_{n \times m^*} \mid \mathbf{I}_n] - [\mathbf{0}_{n \times m^*} \mid \mathbf{I}_n] \mathbf{W}_h \mathbf{U} (\mathbf{U}' \mathbf{W}_h \mathbf{U})^{-1} \mathbf{U}' \right] \hat{\mathbf{y}}_T(h) := \mathbf{P} \hat{\mathbf{y}}_T(h).$$

Hence we can define an alternative representation for the  $\mathbf{P}$  matrix by

$$\mathbf{P} = \mathbf{J} - \mathbf{J} \mathbf{W}_h \mathbf{U} (\mathbf{U}' \mathbf{W}_h \mathbf{U})^{-1} \mathbf{U}',$$

where  $\mathbf{J} = [\mathbf{0}_{n \times m^*} \mid \mathbf{I}_n]$ . □
